# Supplementary material
Source: PubMed Central journal article supplement (PMC2077659)
Supplement: jnnpsyc_jnnp.2006.095612_1.pdf [file jnnpsyc_jnnp.2006.095612_1.pdf]

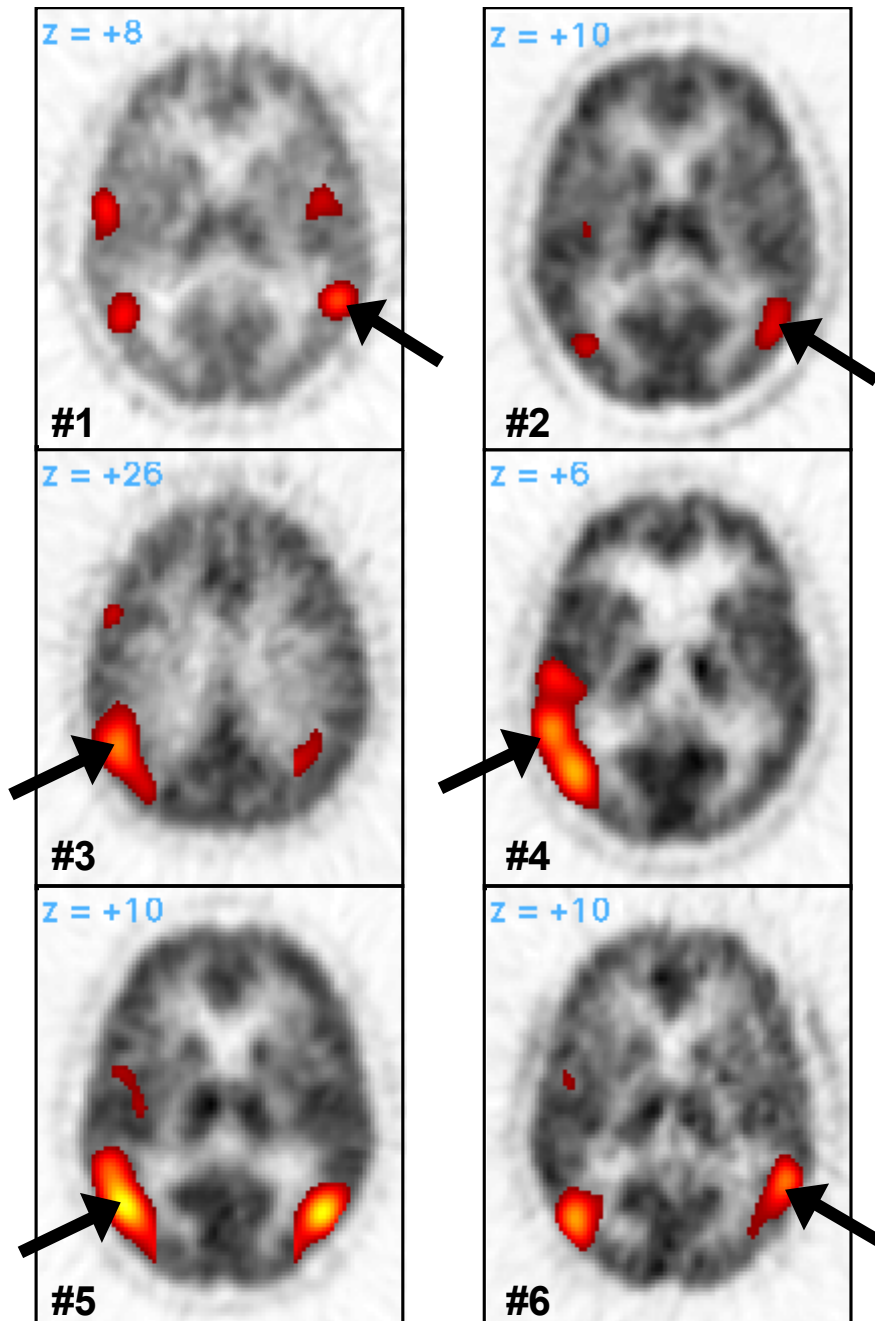

### Legend to supplemental figure

Individual  $\Delta rCBF$  images used to select the rTMS target (black arrow).  $\Delta rCBF$  was masked at 5% of average cortical rCBF and suprathreshold clusters in the temporoparietal cortex were depicted as an overlay over the individual rCBF. For the present figure, images were additionally transformed to stereotactic standard space (MNI).
